# Supplementary material for: miR-98 Regulates TMPRSS2 Expression in Human Endothelial Cells: Key Implications for COVID-19
Source: PubMed Central journal article supplement (PMC7693865; doi:10.3390/biomedicines8110462), 2020-10-30
Supplement: biomedicines-08-00462-s001.pdf [file biomedicines-08-00462-s001.pdf]

## Supplementary Material

**Supplementary Table S1.** Sequences of oligonucleotide primers and product sizes.

|                | <b>Primer</b>  | <b>Sequence (5'-3')</b>    | <b>Amplicon (bp)</b> |
|----------------|----------------|----------------------------|----------------------|
| <b>TMPRSS2</b> | <i>Forward</i> | TAA CTG GTG TGA TGG CGT GT | 102                  |
|                | <i>Reverse</i> | CCA AGG TGA GCA GAG GAG TC |                      |
| <b>GAPDH</b>   | <i>Forward</i> | GGC TCC CTT GGG TAT ATG GT | 94                   |
|                | <i>Reverse</i> | TTG ATT TTG GAG GGA TCT CG |                      |

TMPRSS2: Transmembrane protease serine 2; GAPDH: glyceraldehyde 3-phosphate dehydrogenase.

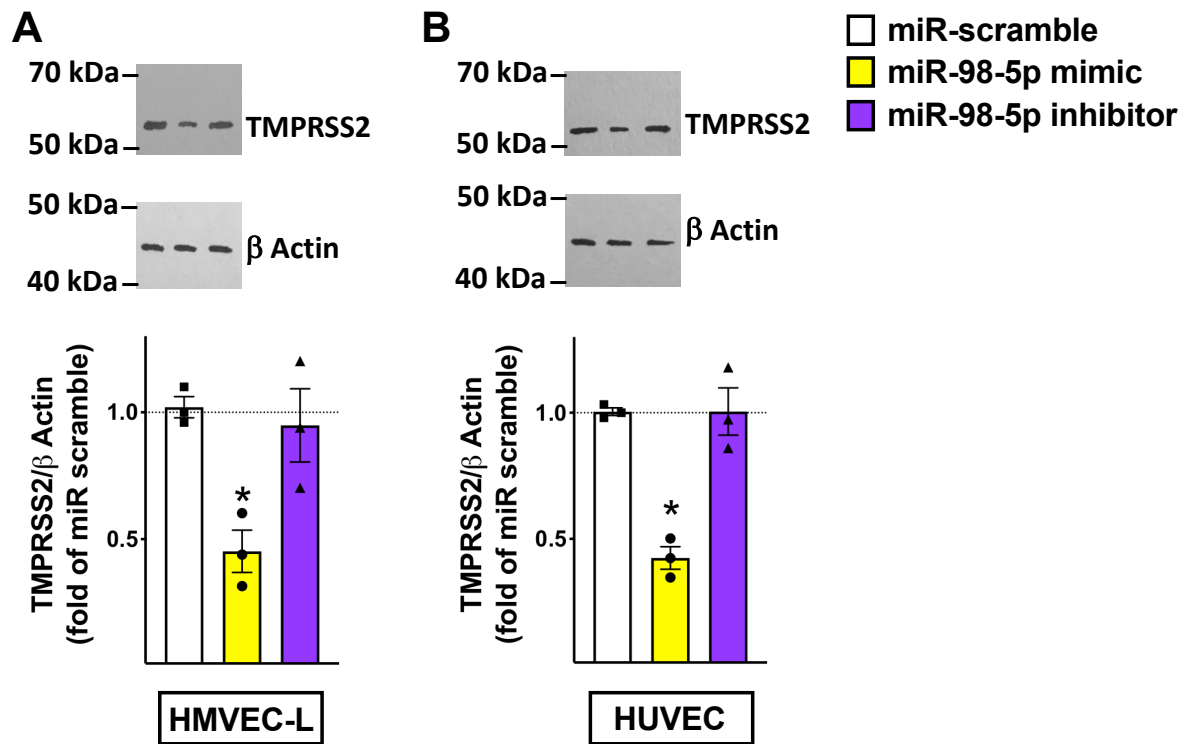

**Supplementary Figure S1. TMPRSS2 expression is significantly reduced by miR-98.** TMPRSS2 protein levels were assessed by immunoblot in HMVEC-L (A) and HUVEC (B) lysates 48 hours after transfection with miR-98 mimic, miR-98 inhibitor, and miR-scramble (negative control). Representative immunoblots from three independent experiments are shown. Means  $\pm$  S.E.M. are shown alongside actual values; \*, $p < 0.05$ .
